# Supplementary material
Source: PubMed Central journal article supplement (PMC3622331)
Supplement: supp_M035154_jlr.M035154-1.pdf [file supp_M035154_jlr.M035154-1.pdf]

**Supplementary Table 1.** Statistics for energy intakes after treatment, related to Figure 1  
2 x 2 - Mixed ANOVA

| DGAT-1i dose | Time after food access (h) | Test of Within- Subjects Effects  |                                  | Test of Between-Subject Effects |
|--------------|----------------------------|-----------------------------------|----------------------------------|---------------------------------|
|              |                            | Treatment:                        | Treatment x Diet:                | Diet:                           |
| 3 mg/kg      | 1                          | $F(1,7) = .011; P = .921$         | $F(1,7) = 2.581; P = .152$       | $F(1,7) = .370; P = .562$       |
|              | 3                          | $F(1,7) = .011; P = .921$         | $F(1,7) = .218; P = .655$        | $F(1,7) = .000; P = .999$       |
|              | 5                          | $F(1,7) = 4.842; P = .064$        | $F(1,7) = 2.926; P = .131$       | $F(1,7) = .026; P = .876$       |
|              | 7                          | $F(1,7) = 16.142; P = .005^{**}$  | $F(1,7) = 13.621; P = .008^{\#}$ | $F(1,7) = .060; P = .814$       |
|              | 8                          | $F(1,7) = .645; P = .448$         | $F(1,7) = 4.914; P = .062$       | $F(1,7) = .000; P = .995$       |
| 9 mg/kg      | 1                          | $F(1,7) = 2.573; P = .153$        | $F(1,7) = 1.750; P = .227$       | $F(1,7) = .232; P = .645$       |
|              | 3                          | $F(1,7) = 20.541; P = .003^{**}$  | $F(1,7) = 14.506; P = .007^{\#}$ | $F(1,7) = .000; P = .983$       |
|              | 5                          | $F(1,7) = 11.616; P = .011^{*}$   | $F(1,7) = 1.938; P = .207$       | $F(1,7) = .066; P = .805$       |
|              | 7                          | $F(1,7) = 23.600; P = .002^{**}$  | $F(1,7) = 1.105; P = .328$       | $F(1,7) = .051; P = .828$       |
|              | 8                          | $F(1,7) = 43.553; P = .000^{***}$ | $F(1,7) = 19.335; P = .003^{\#}$ | $F(1,7) = .031; P = .865$       |

Treatment: DGAT-1i (3 and 9 mg/kg) vs. vehicle; Diet: HFD vs. chow;

\* Significant *treatment* effect (\*  $P < .05$ , \*\*  $P < .01$ , \*\*\*  $P < .001$ ), # Significant *treatment x diet* interaction (#  $P < .01$ )

**Supplementary Table 2.** Mann-Whitney Test  
Grouping variable Diet (HFD vs. Chow)

| Metabolite    | Treatment | After IG infusion (h) | Chow  |       | HFD   |       | U    | P - Value |
|---------------|-----------|-----------------------|-------|-------|-------|-------|------|-----------|
|               |           |                       | MR    | Mdn   | MR    | Mdn   |      |           |
| TG            | Vehicle   | Baseline              | 5.71  | 0.197 | 9.29  | 0.260 | 12.0 | 0.128     |
|               |           | 2                     | 4.00  | 0.93  | 11.00 | 2.131 | 0.0  | 0.001*    |
|               |           | 3                     | 4.86  | 1.477 | 10.14 | 2.879 | 6.0  | 0.017*    |
|               |           | 5                     | 6.00  | 0.754 | 9.00  | 0.865 | 14.0 | 0.209     |
|               | DGAT-1i   | Baseline              | 6.43  | 0.260 | 8.57  | 0.218 | 17.0 | 0.383     |
|               |           | 2                     | 8.43  | 0.873 | 6.57  | 0.690 | 18.0 | 0.456     |
|               |           | 3                     | 10.71 | 1.145 | 4.29  | 0.625 | 2.0  | 0.002*    |
|               |           | 5                     | 9.00  | 0.917 | 6.00  | 0.637 | 14.0 | 0.209     |
| Free Glycerol | Vehicle   | Baseline              | 6.29  | 0.702 | 8.71  | 0.764 | 16.0 | 0.318     |
|               |           | 2                     | 4.29  | 0.066 | 10.71 | 0.183 | 2.0  | 0.002*    |
|               |           | 3                     | 4.29  | 0.073 | 10.71 | 0.200 | 2.0  | 0.002*    |
|               |           | 5                     | 4.86  | 0.076 | 10.14 | 0.123 | 6.0  | 0.017*    |
|               | DGAT-1i   | Baseline              | 9.0   | 0.772 | 6.0   | 0.579 | 14.0 | 0.197     |
|               |           | 2                     | 5.43  | 0.044 | 9.57  | 0.082 | 10.0 | 0.073     |
|               |           | 3                     | 4.43  | 0.065 | 10.57 | 0.171 | 3.0  | 0.004*    |
|               |           | 5                     | 4.0   | 0.089 | 11.00 | 0.159 | 0.0  | 0.001*    |
| NEFA          | Vehicle   | Baseline              | 6.29  | 2.151 | 8.71  | 2.293 | 16.0 | 0.318     |
|               |           | 2                     | 4.43  | 0.087 | 10.57 | 0.494 | 3.0  | 0.004*    |
|               |           | 3                     | 4.0   | 0.092 | 11.0  | 0.474 | 0.0  | 0.001*    |
|               |           | 5                     | 5.71  | 0.297 | 9.29  | 0.335 | 12.0 | 0.128     |
|               | DGAT-1i   | Baseline              | 9.0   | 2.376 | 6.0   | 1.682 | 14.0 | 0.209     |
|               |           | 2                     | 4.71  | 0.084 | 10.29 | 0.386 | 5.0  | 0.011*    |
|               |           | 3                     | 4.0   | 0.101 | 11.0  | 0.628 | 0.0  | 0.001*    |
|               |           | 5                     | 4.0   | 0.225 | 11.0  | 0.585 | 0.0  | 0.001*    |
| BHB           | Vehicle   | Baseline              | 8.71  | 124.0 | 6.29  | 80.0  | 16.0 | 0.318     |
|               |           | 2                     | 4.0   | 38.0  | 11.0  | 178.0 | 0.0  | 0.001*    |
|               |           | 3                     | 4.0   | 39.0  | 11.0  | 181.0 | 0.0  | 0.001*    |
|               |           | 5                     | 5.29  | 73.0  | 9.71  | 161.0 | 9.0  | 0.53      |
|               | DGAT-1i   | Baseline              | 4.71  | 125.0 | 10.29 | 336.0 | 5.0  | 0.011*    |
|               |           | 2                     | 4.0   | 45.0  | 11.0  | 339.0 | 0.0  | 0.001*    |
|               |           | 3                     | 4.0   | 39.0  | 11.0  | 445.0 | 0.0  | 0.001*    |
|               |           | 5                     | 4.0   | 74.0  | 11.0  | 574.0 | 0.0  | 0.001*    |

MR, Mean Rank; Mdn, Median

\*  $P < .05$ , Exact Sig. (2-tailed)

**Supplementary Table 3.** Wilcoxon signed ranks test  
Testing variable Time (2, 3, 5 h after infusion vs. Baseline)

|               |      |           | After IG infusion (h) |       |       |          | Z                    | P - Value |
|---------------|------|-----------|-----------------------|-------|-------|----------|----------------------|-----------|
| Metabolite    | Diet | Treatment | 2                     | 3     | 5     | Baseline |                      |           |
|               |      |           | Mdn                   | Mdn   | Mdn   | Mdn      |                      |           |
| TG            | Chow | Vehicle   | 0.930                 |       |       | 0.197    | - 2.366 <sup>a</sup> | 0.016*    |
|               |      |           |                       | 1.477 |       | 0.197    | - 2.366 <sup>a</sup> | 0.016*    |
|               |      |           |                       |       | 0.754 | 0.197    | - 2.366 <sup>a</sup> | 0.016*    |
|               |      | DGAT-1i   | 0.873                 |       |       | 0.260    | - 2.366 <sup>a</sup> | 0.016*    |
|               |      |           |                       | 1.145 |       | 0.260    | - 2.366 <sup>a</sup> | 0.016*    |
|               |      |           |                       |       | 0.917 | 0.260    | - 2.371 <sup>a</sup> | 0.016*    |
|               | HFD  | Vehicle   | 2.131                 |       |       | 0.260    | - 2.366 <sup>a</sup> | 0.016*    |
|               |      |           |                       | 2.879 |       | 0.260    | - 2.366 <sup>a</sup> | 0.016*    |
|               |      |           |                       |       | 0.865 | 0.260    | - 2.366 <sup>a</sup> | 0.016*    |
|               |      | DGAT-1i   | 0.690                 |       |       | 0.218    | - 2.366 <sup>a</sup> | 0.016*    |
|               |      |           |                       | 0.625 |       | 0.218    | - 2.366 <sup>a</sup> | 0.016*    |
|               |      |           |                       |       | 0.637 | 0.218    | - 2.366 <sup>a</sup> | 0.016*    |
| Free Glycerol | Chow | Vehicle   | 0.066                 |       |       | 0.702    | - 2.366 <sup>b</sup> | 0.016*    |
|               |      |           |                       | 0.073 |       | 0.702    | - 2.366 <sup>b</sup> | 0.016*    |
|               |      |           |                       |       | 0.076 | 0.702    | - 2.366 <sup>b</sup> | 0.016*    |
|               |      | DGAT-1i   | 0.044                 |       |       | 0.772    | - 2.366 <sup>b</sup> | 0.016*    |
|               |      |           |                       | 0.065 |       | 0.772    | - 2.366 <sup>b</sup> | 0.016*    |
|               |      |           |                       |       | 0.065 | 0.772    | - 2.366 <sup>b</sup> | 0.016*    |
|               | HFD  | Vehicle   | 0.183                 |       |       | 0.764    | - 2.366 <sup>b</sup> | 0.016*    |
|               |      |           |                       | 0.200 |       | 0.764    | - 2.366 <sup>b</sup> | 0.016*    |
|               |      |           |                       |       | 0.123 | 0.764    | - 2.366 <sup>b</sup> | 0.016*    |
|               |      | DGAT-1i   | 0.579                 |       |       | 0.579    | - 2.366 <sup>b</sup> | 0.016*    |
|               |      |           |                       | 0.082 |       | 0.579    | - 2.371 <sup>b</sup> | 0.016*    |
|               |      |           |                       |       | 0.171 | 0.579    | - 2.366 <sup>b</sup> | 0.016*    |
| NEFA          | Chow | Vehicle   | 0.087                 |       |       | 2.151    | - 2.371 <sup>b</sup> | 0.016*    |
|               |      |           |                       | 0.092 |       | 2.151    | - 2.366 <sup>b</sup> | 0.016*    |
|               |      |           |                       |       | 0.297 | 2.151    | - 2.366 <sup>b</sup> | 0.016*    |
|               |      | DGAT-1i   | 0.084                 |       |       | 2.376    | - 2.366 <sup>b</sup> | 0.016*    |
|               |      |           |                       | 0.101 |       | 2.376    | - 2.366 <sup>b</sup> | 0.016*    |
|               |      |           |                       |       | 0.225 | 2.376    | - 2.366 <sup>b</sup> | 0.016*    |
|               | HFD  | Vehicle   | 0.494                 |       |       | 2.293    | - 2.366 <sup>b</sup> | 0.016*    |
|               |      |           |                       | 0.474 |       | 2.293    | - 2.366 <sup>b</sup> | 0.016*    |
|               |      |           |                       |       | 0.335 | 2.293    | - 2.366 <sup>b</sup> | 0.016*    |
|               |      | DGAT-1i   | 0.386                 |       |       | 1.682    | - 2.366 <sup>b</sup> | 0.016*    |
|               |      |           |                       | 0.628 |       | 1.682    | - 2.366 <sup>b</sup> | 0.016*    |
|               |      |           |                       |       | 0.585 | 1.682    | - 2.366 <sup>b</sup> | 0.016*    |
| BHB           | Chow | Vehicle   | 38.00                 |       |       | 124.0    | - 2.371 <sup>b</sup> | 0.016*    |
|               |      |           |                       | 39.00 |       | 124.0    | - 2.371 <sup>b</sup> | 0.016*    |
|               |      |           |                       |       | 73.00 | 124.0    | - 2.197 <sup>b</sup> | 0.031*    |
|               |      | DGAT-1i   | 45.00                 |       |       | 125.0    | - 2.197 <sup>b</sup> | 0.031*    |
|               |      |           |                       | 39.00 |       | 125.0    | - 2.201 <sup>b</sup> | 0.031*    |
|               |      |           |                       |       | 74.00 | 125.0    | - 1.863 <sup>b</sup> | 0.078     |
|               | HFD  | Vehicle   | 178.0                 |       |       | 80.00    | - 0.676 <sup>a</sup> | 0.578     |
|               |      |           |                       | 181.0 |       | 80.00    | - 1.183 <sup>a</sup> | 0.297     |
|               |      |           |                       |       | 161.0 | 80.00    | - 0.507 <sup>a</sup> | 0.688     |
|               |      | DGAT-1i   | 339.0                 |       |       | 336.0    | - 1.153 <sup>a</sup> | 0.313     |
|               |      |           |                       | 445.0 |       | 336.0    | - 2.366 <sup>a</sup> | 0.016*    |
|               |      |           |                       |       | 574.0 | 336.0    | - 1.859 <sup>a</sup> | 0.078     |

Mdn, Median

a. Based on negative ranks (2, 3 & 5 h < Baseline)

b. Based on positive ranks (2, 3 & 5 h > Baseline)

\* P < .05, Exact Sig. (2-tailed)

**Supplementary Table 4.** Wilcoxon signed ranks test  
Testing variable Treatment (DGAT-1i vs. Vehicle)

| Metabolite    | Diet | After IG infusion (h) | DGAT-1i | Vehicle | Z                    | P - Value |
|---------------|------|-----------------------|---------|---------|----------------------|-----------|
|               |      |                       | Mdn     | Mdn     |                      |           |
| TG            | Chow | Baseline              | 0.260   | 0.197   | - 0.338 <sup>a</sup> | 0.813     |
|               |      | 2                     | 0.873   | 0.93    | - 1.270 <sup>a</sup> | 0.234     |
|               |      | 3                     | 1.145   | 1.477   | - 0.845 <sup>a</sup> | 0.469     |
|               |      | 5                     | 0.917   | 0.754   | - 2.028 <sup>b</sup> | 0.047*    |
|               | HFD  | Baseline              | 0.218   | 0.260   | - 0.169 <sup>a</sup> | 0.938     |
|               |      | 2                     | 0.690   | 2.131   | - 2.366 <sup>a</sup> | 0.016*    |
|               |      | 3                     | 0.625   | 2.879   | - 2.336 <sup>a</sup> | 0.016*    |
|               |      | 5                     | 0.637   | 0.865   | - 1.183 <sup>a</sup> | 0.297     |
| Free Glycerol | Chow | Baseline              | 0.772   | 0.702   | - 0.845 <sup>b</sup> | 0.469     |
|               |      | 2                     | 0.044   | 0.066   | - 0.423 <sup>a</sup> | 0.734     |
|               |      | 3                     | 0.065   | 0.073   | - 0.507 <sup>a</sup> | 0.688     |
|               |      | 5                     | 0.089   | 0.076   | - 0.507 <sup>b</sup> | 0.688     |
|               | HFD  | Baseline              | 0.579   | 0.764   | - 1.352 <sup>a</sup> | 0.219     |
|               |      | 2                     | 0.082   | 0.183   | - 2.028 <sup>a</sup> | 0.047*    |
|               |      | 3                     | 0.171   | 0.200   | - 1.521 <sup>a</sup> | 0.156     |
|               |      | 5                     | 0.159   | 0.123   | -2.028 <sup>b</sup>  | 0.047*    |
| NEFA          | Chow | Baseline              | 2.376   | 2.151   | - 1.014 <sup>b</sup> | 0.375     |
|               |      | 2                     | 0.084   | 0.087   | - 0.676 <sup>a</sup> | 0.578     |
|               |      | 3                     | 0.101   | 0.092   | - 1.272 <sup>a</sup> | 0.250     |
|               |      | 5                     | 0.225   | 0.297   | - 1.609 <sup>a</sup> | 0.125     |
|               | HFD  | Baseline              | 1.682   | 2.293   | - 1.521 <sup>a</sup> | 0.156     |
|               |      | 2                     | 0.386   | 0.494   | - 1.183 <sup>a</sup> | 0.297     |
|               |      | 3                     | 0.628   | 0.474   | - 1.439 <sup>b</sup> | 0.172     |
|               |      | 5                     | 0.585   | 0.335   | - 2.366 <sup>b</sup> | 0.016*    |
| BHB           | Chow | Baseline              | 125.0   | 124.0   | - 0.507 <sup>b</sup> | 0.688     |
|               |      | 2                     | 45.0    | 38.0    | - 1.442 <sup>b</sup> | 0.188     |
|               |      | 3                     | 39.0    | 39.0    | - 0.508 <sup>b</sup> | 0.672     |
|               |      | 5                     | 74.0    | 73.0    | - 0.676 <sup>b</sup> | 0.578     |
|               | HFD  | Baseline              | 336.0   | 80.0    | - 2.366 <sup>b</sup> | 0.016*    |
|               |      | 2                     | 339.0   | 178.0   | - 2.366 <sup>b</sup> | 0.016*    |
|               |      | 3                     | 445.0   | 181.0   | - 2.366 <sup>b</sup> | 0.016*    |
|               |      | 5                     | 574.0   | 161.0   | - 2.366 <sup>b</sup> | 0.016*    |

Mdn, Median

a. Based on positive ranks (DGAT-1i > Vehicle)

b. Based on negative ranks (DGAT-1i < Vehicle)

\*  $P < .05$ , Exact Sig. (2-tailed)

**Supplementary Table 5A.** Mann-Whitney Test  
Grouping variable Treatment (DGAT-1i vs. Vehicle)

| Tissue      | Protein           | Diet | Vehicle  |           | DGAT-1i  |           | U     | P - Value |
|-------------|-------------------|------|----------|-----------|----------|-----------|-------|-----------|
|             |                   |      | MR       | Mdn       | MR       | Mdn       |       |           |
| Liver       | CPT-1             | Chow | 5.50     | 102.9774  | 3.50     | 89.6743   | 4.0   | 0.343     |
|             |                   | HFD  | 4.75     | 190.2010  | 4.25     | 177.5755  | 7.0   | 0.886     |
|             | p-AMPK/AMPK ratio | Chow | 4.75     | 94.4225   | 4.25     | 91.0241   | 7.0   | 0.886     |
|             |                   | HFD  | 5.00     | 318.3117  | 4.00     | 296.5340  | 6.0   | 0.686     |
|             | HMG-CoAS2         | Chow | 5.50     | 96.3569   | 3.50     | 83.3159   | 4.0   | 0.343     |
|             |                   | HFD  | 5.75     | 107.0562  | 3.25     | 72.2746   | 3.0   | 0.200     |
| Complex III | Chow              | 6.00 | 95.6690  | 3.00      | 75.6652  | 2.0       | 0.114 |           |
|             | HFD               | 4.50 | 100.2408 | 4.50      | 100.3510 | 8.0       | 1.000 |           |
| Duodenum    | HMG-CoAS2         | Chow | 5.00     | 99.1405   | 4.00     | 100.2976  | 6.0   | 0.686     |
|             |                   | HFD  | 3.75     | 143.8945  | 5.25     | 160.2699  | 5.0   | 0.486     |
|             | Complex III       | Chow | 4.00     | 112.2900  | 5.00     | 259.0919  | 6.0   | 0.686     |
|             |                   | HFD  | 3.00     | 1586.8068 | 6.00     | 4317.5881 | 2.0   | 0.114     |
| Jejunum     | HMG-CoAS2         | Chow | 4.75     | 105.6665  | 4.25     | 100.6998  | 7.0   | 0.886     |
|             |                   | HFD  | 2.50     | 177.3431  | 6.50     | 288.7063  | 0.0   | 0.029*    |
|             | Complex III       | Chow | 3.50     | 76.6257   | 5.50     | 124.0154  | 4.0   | 0.343     |
|             |                   | HFD  | 2.50     | 135.7654  | 6.50     | 475.9557  | 0.0   | 0.029*    |

**Supplementary Table 5B.** Mann-Whitney Test  
Grouping variable Diet (HFD vs. Chow)

| Tissue      | Protein           | Treatment | Chow    |          | HFD      |           | U     | P - Value          |
|-------------|-------------------|-----------|---------|----------|----------|-----------|-------|--------------------|
|             |                   |           | MR      | Mdn      | MR       | Mdn       |       |                    |
| Liver       | CPT-1             | Vehicle   | 2.50    | 102.9774 | 6.50     | 190.3453  | 0.0   | 0.029 <sup>#</sup> |
|             |                   | DGAT-1i   | 2.50    | 89.6734  | 6.50     | 177.5755  | 0.0   | 0.029 <sup>#</sup> |
|             | p-AMPK/AMPK ratio | Vehicle   | 2.50    | 94.4225  | 6.50     | 318.3117  | 0.0   | 0.029 <sup>#</sup> |
|             |                   | DGAT-1i   | 2.50    | 91.0241  | 6.50     | 296.5340  | 0.0   | 0.029 <sup>#</sup> |
|             | HMG-CoAS2         | Vehicle   | 4.0     | 96.3569  | 5.0      | 107.0562  | 6.0   | 0.686              |
|             |                   | DGAT-1i   | 5.75    | 83.3159  | 3.25     | 72.2746   | 3.0   | 0.200              |
| Complex III | Vehicle           | 4.25      | 95.6690 | 4.75     | 100.2408 | 7.0       | 0.886 |                    |
|             | DGAT-1i           | 4.00      | 75.6652 | 5.00     | 100.3510 | 6.0       | 0.686 |                    |
| Duodenum    | HMG-CoAS2         | Vehicle   | 2.50    | 99.1405  | 6.50     | 143.8945  | 0.0   | 0.029 <sup>#</sup> |
|             |                   | DGAT-1i   | 2.50    | 100.2976 | 6.50     | 160.2699  | 0.0   | 0.029 <sup>#</sup> |
|             | Complex III       | Vehicle   | 2.50    | 112.2900 | 6.50     | 1586.8068 | 0.0   | 0.029 <sup>#</sup> |
|             |                   | DGAT-1i   | 2.50    | 259.0919 | 6.50     | 4317.5881 | 0.0   | 0.029 <sup>#</sup> |
| Jejunum     | HMG-CoAS2         | Vehicle   | 2.50    | 105.6665 | 6.50     | 177.3431  | 0.0   | 0.029 <sup>#</sup> |
|             |                   | DGAT-1i   | 2.50    | 100.6998 | 6.50     | 288.7063  | 0.0   | 0.029 <sup>#</sup> |
|             | Complex III       | Vehicle   | 3.75    | 76.6257  | 5.25     | 135.7654  | 5.0   | 0.486              |
|             |                   | DGAT-1i   | 2.50    | 124.0154 | 6.50     | 475.9557  | 0.0   | 0.029 <sup>#</sup> |

MR, Mean Rank; Mdn, Median

\*  $P < .05$  (Vehicle vs. DGAT-1i within diet group); <sup>#</sup>  $P < .05$  (Chow vs. HFD within treatment group); Exact Sig. (2-tailed)

**Supplementary Table 6.** Best-fit parameter values of non-linear regression

|                     |                  | DGAT-1i<br>[ $\mu$ M] | Best-fit values     |                  | Std. Error          | 95% CI              |                  | Goodness of Fit |                |
|---------------------|------------------|-----------------------|---------------------|------------------|---------------------|---------------------|------------------|-----------------|----------------|
|                     |                  |                       | LogEC <sub>50</sub> | EC <sub>50</sub> | LogEC <sub>50</sub> | LogEC <sub>50</sub> | EC <sub>50</sub> | df              | R <sup>2</sup> |
| CaCo2 <sup>a</sup>  | <sup>14</sup> C- | 0.001-10              | -0.457              | 0.3494           | 0.0947              | -0.653 to -0.261    | 0.223 to 0.549   | 23              | 0.725          |
| HuTu80 <sup>b</sup> | Palmitate        | 0.001-10              | -2.111              | 0.0078*          | 0.2768              | -2.680 to -1.542    | 0.002 to 0.029   | 26              | 0.638          |
| HuTu80 <sup>b</sup> | <sup>14</sup> C- | 0.0001-0.1            | -2.197              | 0.0064*          | 0.0363              | -2.272 to -2.122    | 0.005 to 0.008   | 24              | 0.991          |
| HuTu80 <sup>b</sup> | Oleate           | 0.0001-1              | -2.059              | 0.0087*          | 0.0419              | -2.145 to -1.972    | 0.007 to 0.011   | 24              | 0.987          |

Best-fit values for concentration-response curves of CaCo2 and HuTu80 cell lines incubated with different DGAT-1i concentrations. <sup>a</sup> log(agonist) vs. response equation for four parameters, <sup>b</sup> log(agonist) vs. response equation for three-parameters; \* Significant difference between cell lines; Bonferroni post-hoc test ( $P < .001$  vs. CaCo2 <sup>14</sup>C-Palmitate) after significant one-way ANOVA ( $F(3,97) = 27.22$ ,  $P < .001$ ).

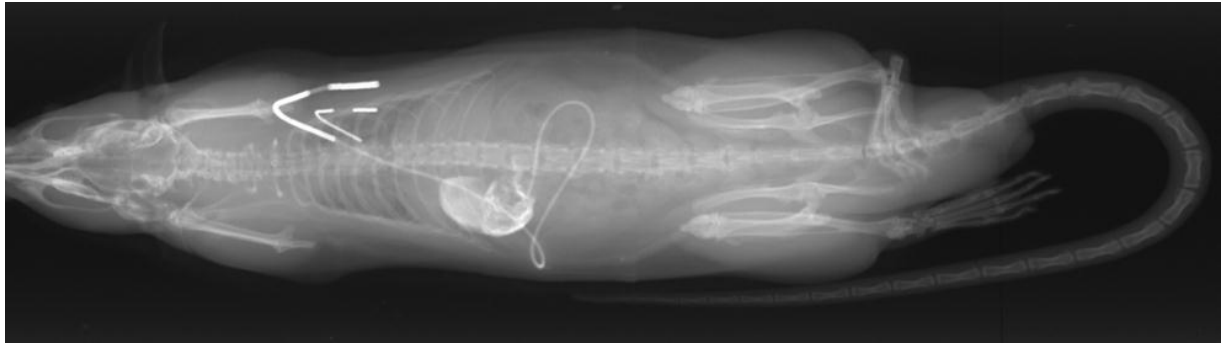

**Supplementary Fig. 1.** Intragastric (IG) catheter verification by x-ray scans (LaTheta LCT-100 CT scanner). Rats were fasted overnight and x-ray scans were taken after IG infusion of diluted contrast agent (1:2; Accupaque TM, GE healthcare, UK; 0.6 ml, 2 parts Accupaque + 1 part saline) under isoflurane inhalation anesthesia. The representative picture shows the accumulation of the contrast agent in the stomach indicating an intact IG catheter.

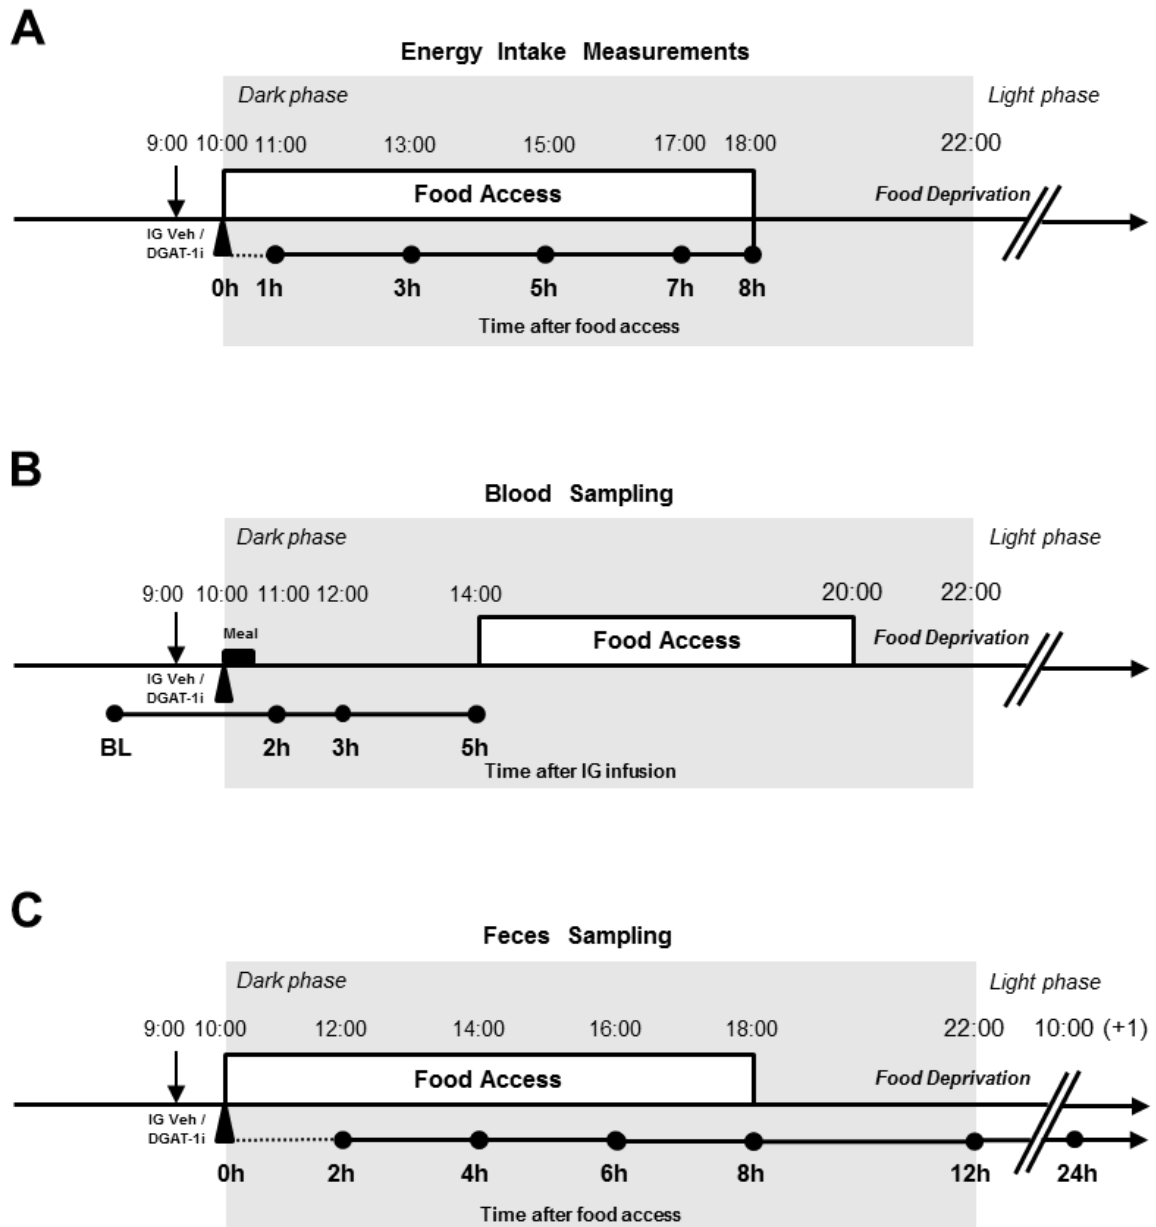

**Supplementary Fig. 2.** Experimental design of (A) energy intake, (B) blood sampling and (C) feces sampling experiments. Acute intragastric (IG) vehicle (Veh) or DGAT-1i infusions ( $\downarrow$ ; 5 ml/kg) were always performed 1 hour prior dark onset. At dark onset ( $\blacktriangle$ , 10:00) either food access was established for 8 h (A and C) or rats received an iso-caloric test meal ( $\blacksquare$ ; B), consisting of 3 g HFD or 5 g chow after 16 h food deprivation. Energy intake measurements or blood and feces samplings were performed at the times indicated by solid circles ( $\bullet$ ). Shaded areas indicate dark phase. BL, base line; HFD, high fat diet



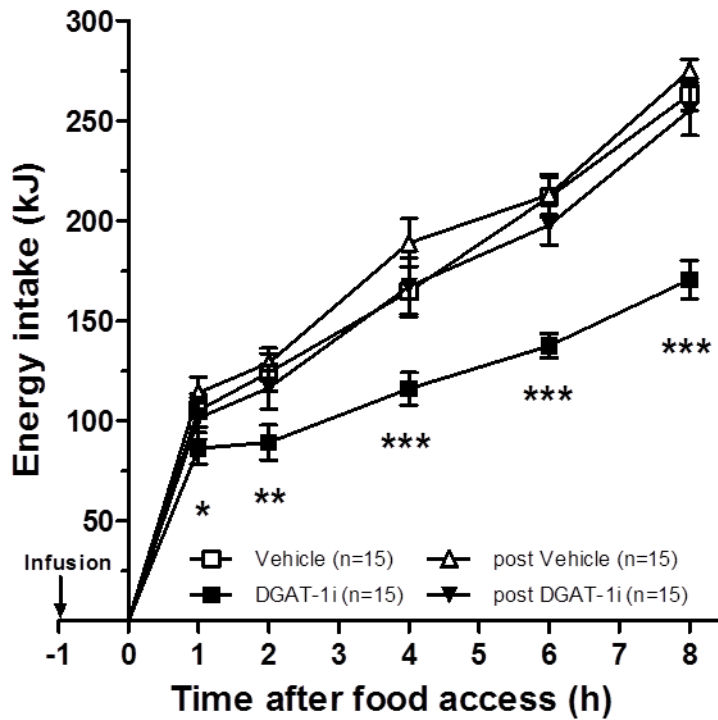

**Supplementary Fig. 3.** The eating inhibitory effect of IG DGAT-1i on HFD-fed rats was not compensated on the next day when rats were left untreated. The energy intake was measured every 1 – 2 hours after IG DGAT-1i (10 mg/kg; ■) or vehicle (□) infusions (↓; 5 ml/kg) during the 8 h feeding period. Energy intake measurements were also performed on the subsequent day when no IG infusions took place (post vehicle, Δ; post DGAT-1i, ▼). Data are shown as means ± SEM and were analyzed for each day separately by paired t-test. Comparisons were made for individual time points. \*  $P < 0.05$ , \*\*  $P < 0.01$ , \*\*\*  $P < 0.001$  vs. vehicle.

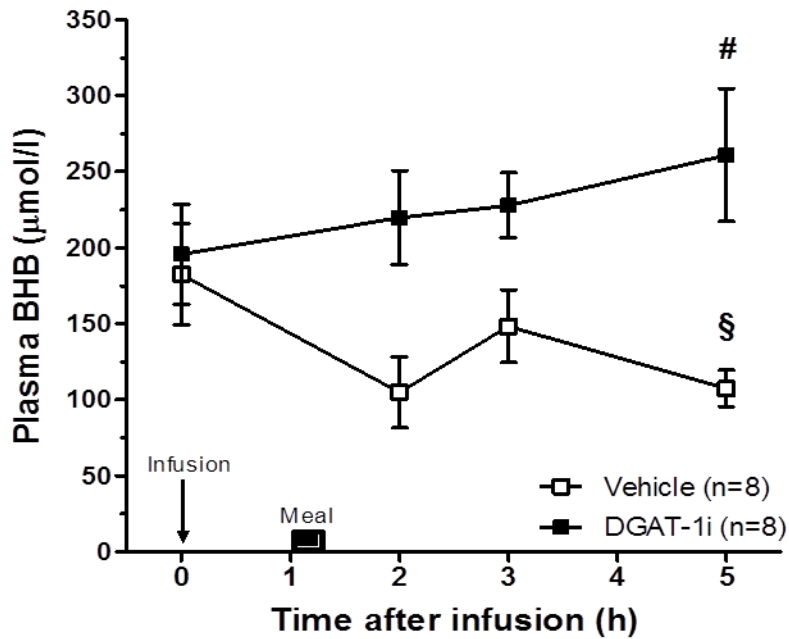

**Supplementary Fig. 4.** Acute IG DGAT-1i infusions increased circulating plasma BHB levels in HFD-fed rats, which is indicative for induced ketogenesis. Rats were food deprived for 16 h during light phase and re-fed with a 5 g HFD meal at dark onset (10:00). Acute IG infusions ( $\downarrow$ ; 5 ml/kg) of DGAT-1i (9 mg/kg; ■) or vehicle (□) were given 1 h before dark onset. Data are means  $\pm$  SEM for 8 animals per group. Analysis of plasma BHB across all four time points by a  $2 \times 4$  (treatment  $\times$  time) repeated measures ANOVA, yielded a significant treatment effect ( $P < 0.05$ ) and *treatment  $\times$  diet* interaction ( $P < 0.05$ ). #  $P < 0.05$  vs. vehicle, §  $P < 0.05$  vs. baseline (time 0) in Bonferroni Holm post-hoc tests after significant ANOVA.
